# Supplementary material
Source: ML conference proceedings conference paper supplement (https://aclanthology.org/2024.codi-1.14)
Supplement: SupplementaryMaterial [file amr_rot.drawio.pdf › images/amr_rot.drawio.pdf]

(1) You can't leave any remnants of that universe but I feel horrible for Henry, he was fantastic.

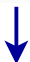

(2)

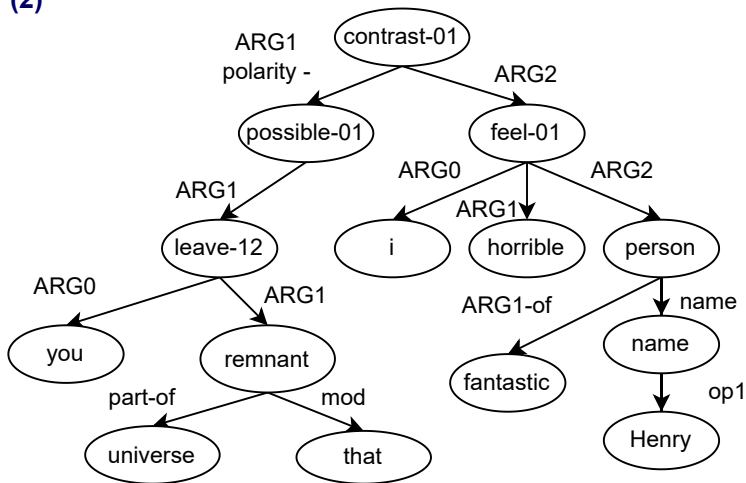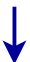

Truncate at depth = 2

(3)

```
( c / contrast-01
  :ARG1 ( p / possible-01
    :polarity -
    :ARG1 ( l / leave-12
  ))
  :ARG2 ( f / feel-01
    :ARG0 ( ii / i)
    :ARG1 ( h / horrible)
    :ARG2 ( p2 / person
  )))
```
