# Supplementary material
Source: ML conference proceedings conference paper supplement (https://aclanthology.org/2024.codi-1.14)
Supplement: SupplementaryMaterial [file discodial2.drawio.pdf › images/discodial2.drawio.pdf]

1. title, it wont let me change worlds other than the 3 tournament worlds

**Answer**

**Humor**

2. look at the post 2 posts below this 1

6. lol

**Question**

**Appreciation**

3. found it ty

4. Best way to deal with healers on Jad?

**Answer**

5. On 'new' not 'hot'
