# Supplementary material
Source: ML conference proceedings conference paper supplement (https://aclanthology.org/2024.codi-1.14)
Supplement: SupplementaryMaterial [file linearization_sent.drawio.pdf › images/linearization_sent.drawio.pdf]

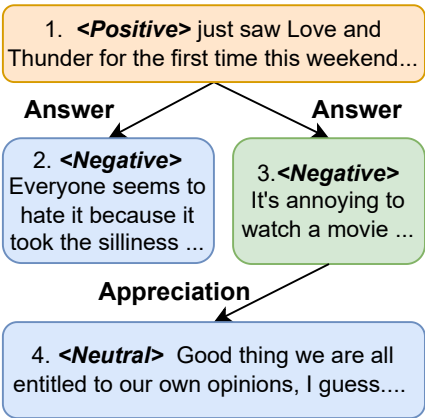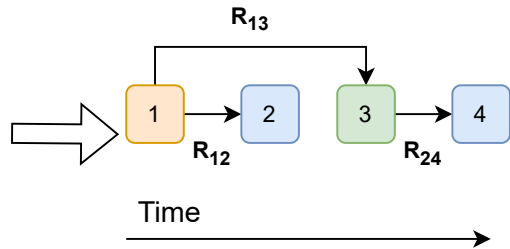

<s1> <u1> <to:u1> <init> <Positive> I just saw Love and Thunder... </s> <s2> <u2> <to:u1> <answer> <Negative> Everyone seems to hate it... </s> <s3> <u3> <to:u1> <answer> <Negative> It's annoying to watch a movie with so many jokes crammed in... </s> <s2> <u4> <to:u3> <appreciation> <Neutral> Good thing we are all entitled to our own opinions...

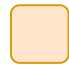

Speaker 1  
(<s1>)

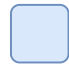

Speaker 2  
(<s2>)

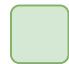

Speaker 3  
(<s3>)
