# Supplementary material
Source: ML conference proceedings conference paper supplement (https://aclanthology.org/2024.codi-1.14)

(a) **NEGATIVE**

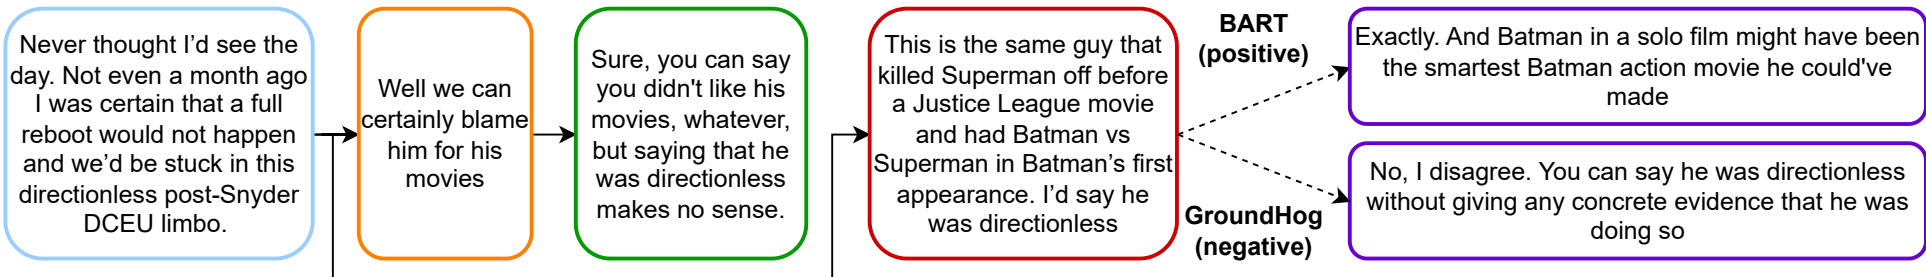

(b)

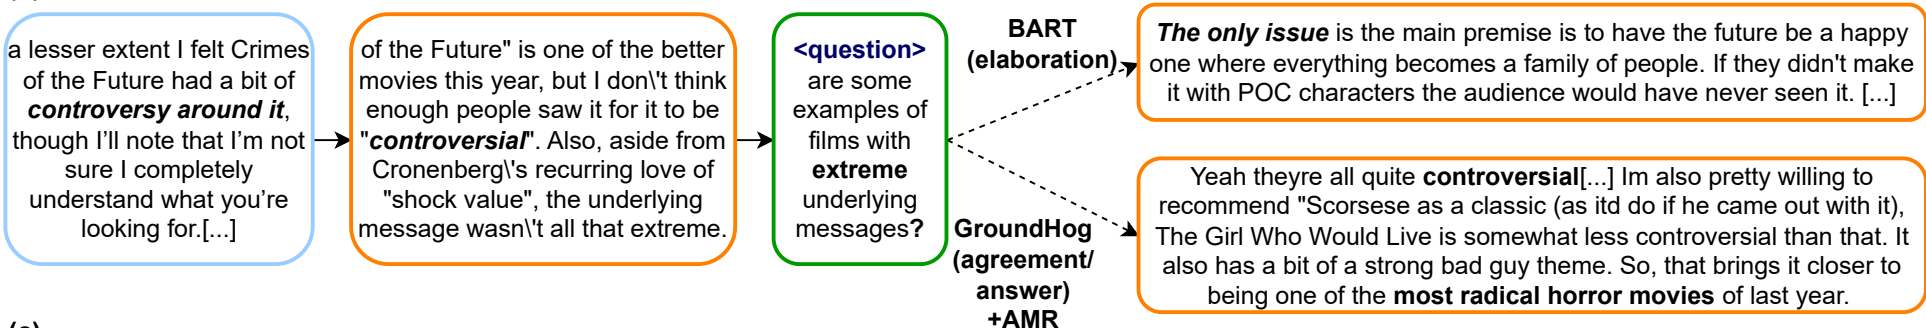

(c)

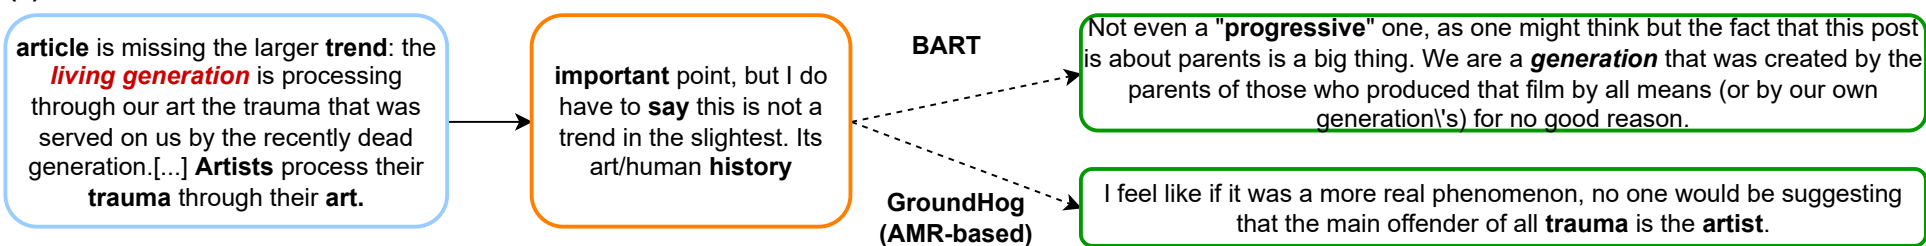

Supplement: SupplementaryMaterial [file groundhog_interp.drawio.pdf › images/groundhog_interp.drawio.pdf]

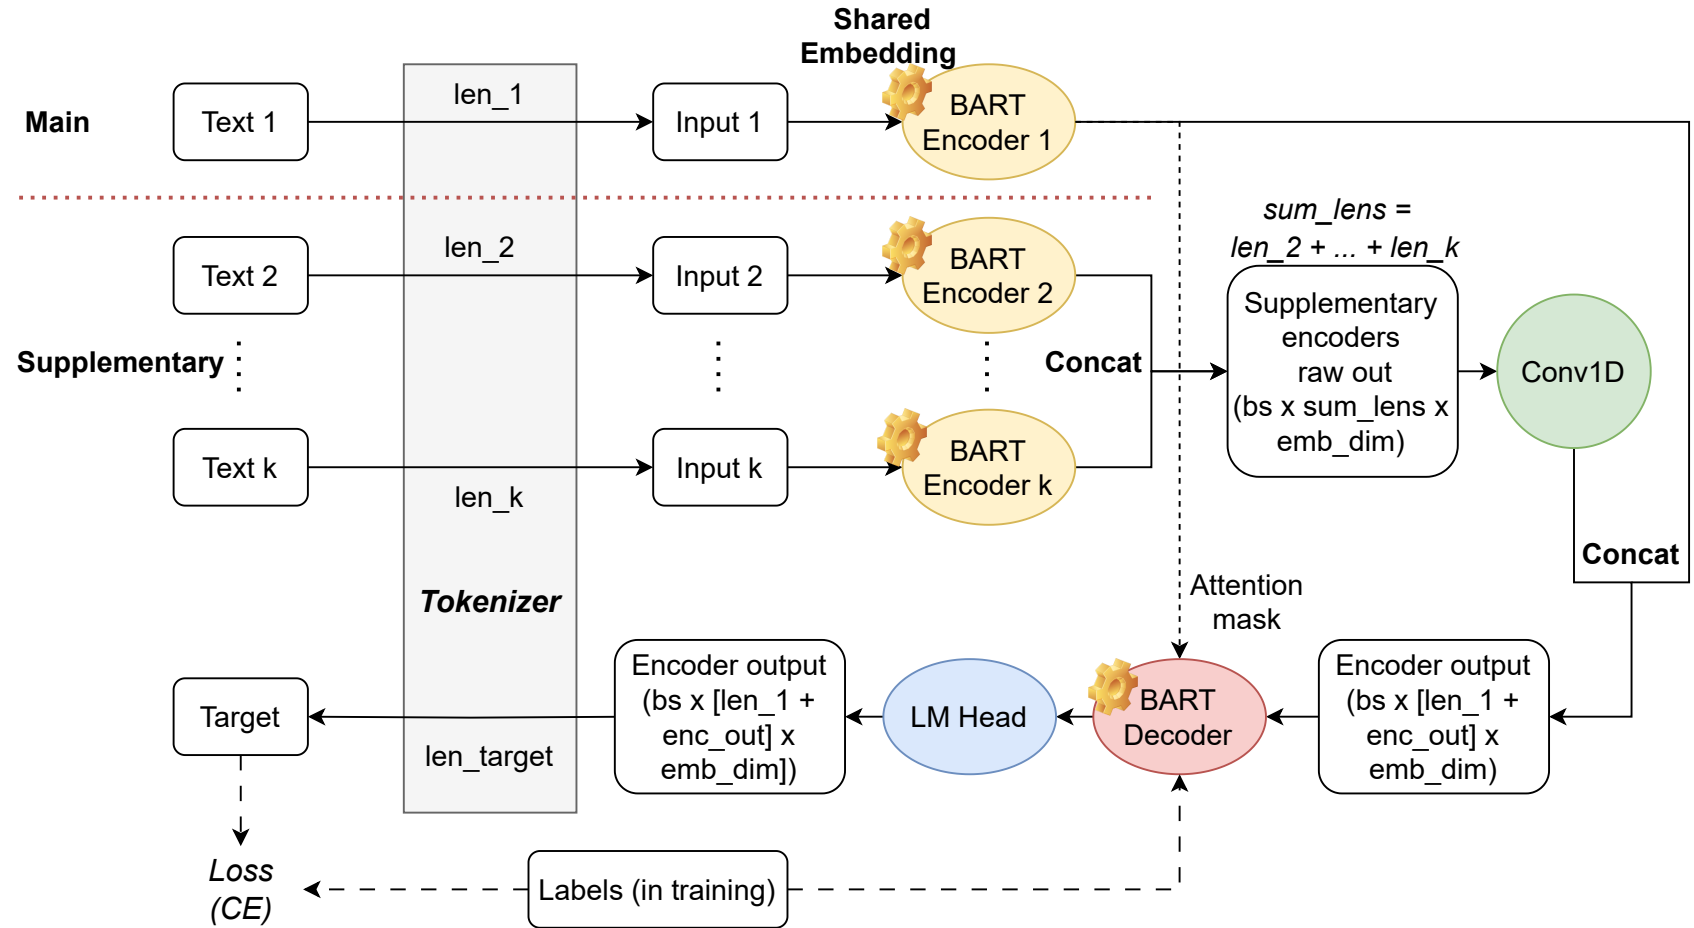

Supplement: SupplementaryMaterial [file multienc_bart.drawio_v2.drawio.pdf › images/multienc_bart.drawio_v2.drawio.pdf]

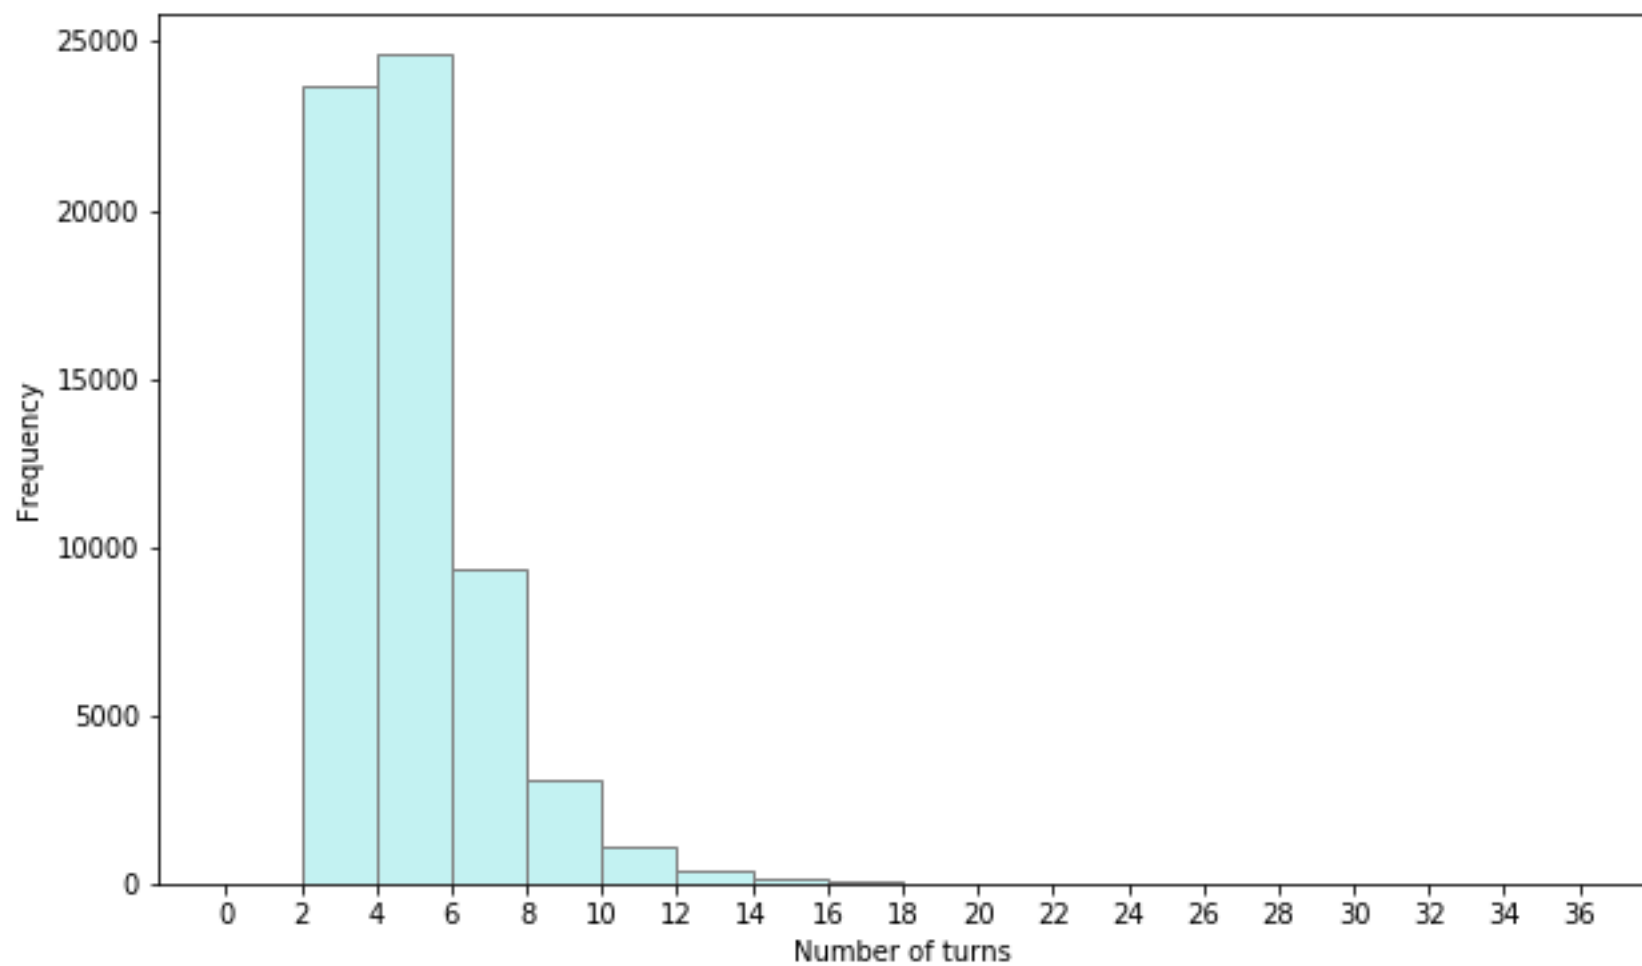

Supplement: SupplementaryMaterial [file png2pdf_hist.pdf › images/png2pdf_hist.pdf]
